# Supplementary material for: The Plant V-ATPase
Source: Front Plant Sci. 2022 Jun 30;13:931777. doi: 10.3389/fpls.2022.931777 (PMC9280200; doi:10.3389/fpls.2022.931777)
Supplement: Supplementary file 1 [file Table_1.xlsx]

## Sheet: VHA-A
AGI	Name	Type	Locus
AT1G78900	GABI_071E01	insertion	intron
AT1G78900	GABI_551C08	insertion	intron
AT1G78900	GABIseq_321C01.1	insertion	5'UTR
AT1G78900	GK-071E01-011734	insertion	intron
AT1G78900	ossowski_407759	substitution	intron
AT1G78900	ossowski_407760	substitution	promoter
AT1G78900	ossowski_407761	substitution	promoter
AT1G78900	PERL0378608	substitution	promoter
AT1G78900	SALKseq_065598.1	insertion	3'UTR

## Sheet: VHA-B1-3
AGI	Name	Type	Locus
AT1G76030	GABI_071E01	insertion	intron
AT1G76030	GABI_551C08	insertion	intron
AT1G76030	GABIseq_321C01.1	insertion	5'UTR
AT1G76030	GK-071E01-011734	insertion	intron
AT1G76030	ossowski_407759	substitution	intron
AT1G76030	ossowski_407760	substitution	promoter
AT1G76030	ossowski_407761	substitution	promoter
AT1G76030	PERL0378608	substitution	promoter
AT1G76030	SALKseq_065598.1	insertion	3'UTR
AT4G38510	AY199418	insertion	intron
AT4G38510	AY199419	insertion	intron
AT4G38510	AY199473	insertion	exon
AT4G38510	AY199474	insertion	intron
AT4G38510	CSHL_ET6221	insertion	intron
AT4G38510	CSHL_ET6357	insertion	intron
AT4G38510	FLAG_146A06	insertion	coding_region
AT4G38510	FLAG_146G05	insertion	intron
AT4G38510	GABI_118F04	insertion	3'UTR
AT4G38510	GABI_728A02	insertion	intron
AT4G38510	GK-118F04-012518	insertion	exon
AT4G38510	GK-410F11-017999	insertion	promoter
AT4G38510	GK-546C09-020965	insertion	exon
AT4G38510	GK-546C09-021163	insertion	exon
AT4G38510	GK-546C09-021189	insertion	intron
AT4G38510	GK-728A02-025113	insertion	exon
AT4G38510	GK-728A02-025219	insertion	exon
AT4G38510	ossowski_1165863	insertion	intron
AT4G38510	ossowski_1165864	insertion	promoter
AT4G38510	ossowski_832963	substitution	5'UTR
AT4G38510	ossowski_832966	substitution	intron
AT4G38510	ossowski_832969	substitution	intron
AT4G38510	ossowski_832970	substitution	intron
AT4G38510	ossowski_832971	substitution	intron
AT4G38510	ossowski_832972	substitution	3'UTR
AT4G38510	ossowski_832973	substitution	3'UTR
AT4G38510	ossowski_832974	substitution	3'UTR
AT4G38510	ossowski_832975	substitution	3'UTR
AT4G38510	ossowski_832976	substitution	3'UTR
AT4G38510	ossowski_832977	substitution	intron
AT4G38510	ossowski_832978	substitution	intron
AT4G38510	ossowski_832980	substitution	promoter
AT4G38510	PERL0849300	substitution	exon
AT4G38510	PERL0849301	substitution	exon
AT4G38510	PERL0849302	substitution	exon
AT4G38510	PERL0849305	substitution	intron
AT4G38510	PERL0849307	substitution	intron
AT4G38510	PERL0849308	substitution	intron
AT4G38510	PERL0849309	substitution	intron
AT4G38510	PERL0849310	substitution	intron
AT4G38510	PERL0849312	substitution	intron
AT4G38510	PERL0849313	substitution	intron
AT4G38510	PERL0849319	substitution	intron
AT4G38510	SAIL_36_A09.v1	insertion	intron
AT4G38510	SALK_024554.48.50.x	insertion	3'UTR
AT4G38510	SALK_026464.44.60.x	insertion	intron
AT4G38510	SALK_096820	insertion	promoter
AT4G38510	SALK_096821	insertion	promoter
AT4G38510	SALK_200419	insertion	intron
AT4G38510	SALKseq_070162.0	insertion	5'UTR
AT1G20260	CSHL_GT24570	insertion	5'UTR
AT1G20260	FLAG_580C11	insertion	exon
AT1G20260	GABI_362E10	insertion	5'UTR
AT1G20260	GABI_938B11	insertion	intron
AT1G20260	GABIseq_045A09.1	insertion	coding_region
AT1G20260	GK-362E10-016994	insertion	promoter
AT1G20260	GK-779D03-024867	insertion	promoter
AT1G20260	GK-941H10-032876	insertion	promoter
AT1G20260	GT24570.Ds5.05.21.2008.jz44.741	insertion	exon
AT1G20260	MASC00322	substitution	coding_region
AT1G20260	ossowski_1179502	deletion	promoter
AT1G20260	ossowski_1179503	deletion	intron
AT1G20260	ossowski_1179504	deletion	intron
AT1G20260	ossowski_42177	substitution	promoter
AT1G20260	ossowski_42183	substitution	promoter
AT1G20260	ossowski_42185	substitution	intron
AT1G20260	ossowski_42186	substitution	intron
AT1G20260	ossowski_42188	substitution	intron
AT1G20260	ossowski_42190	substitution	intron
AT1G20260	ossowski_42192	substitution	intron
AT1G20260	ossowski_42194	substitution	intron
AT1G20260	ossowski_42198	substitution	intron
AT1G20260	ossowski_42200	substitution	intron
AT1G20260	ossowski_42205	substitution	intron
AT1G20260	ossowski_42210	substitution	coding_region
AT1G20260	ossowski_42212	substitution	3'UTR
AT1G20260	PERL0051068	substitution	promoter
AT1G20260	PERL0051069	substitution	promoter
AT1G20260	PERL0051071	substitution	intron
AT1G20260	PERL0051077	substitution	intron
AT1G20260	PERL0051080	substitution	intron
AT1G20260	PERL0051081	substitution	intron
AT1G20260	PERL0051083	substitution	intron
AT1G20260	PERL0051084	substitution	exon
AT1G20260	PERL0051087	substitution	exon
AT1G20260	PERL0051090	substitution	exon
AT1G20260	PERL0051091	substitution	exon
AT1G20260	SALK_013508	insertion	exon
AT1G20260	SALK_013508.54.95.x	insertion	exon
AT1G20260	SALK_044237	insertion	promoter
AT1G20260	SALK_083133.26.65.x	insertion	exon
AT1G20260	SALK_152317.46.50.x	insertion	exon
AT1G20260	SALKseq_032758.1	insertion	coding_region
AT1G20260	SALKseq_051473.1	insertion	coding_region
AT1G20260	SALKseq_077042.1	insertion	5'UTR
AT1G20260	SALKseq_083134.1	insertion	coding_region
AT1G20260	SALKseq_089396.1	insertion	intron
AT1G20260	WiscDsLoxHs070_11H	insertion	coding_region

## Sheet: VHA-C
AGI	Name	Type	Locus
AT1G12840	det3-1	unknown
AT1G12840	GABI_100C08	insertion	coding_region
AT1G12840	GABI_786C11	insertion	intron
AT1G12840	GK-100C08-012119	insertion	intron
AT1G12840	GK-786C11-024946	insertion	intron
AT1G12840	MASC00280	substitution	coding_region
AT1G12840	MASC08180	substitution	coding_region
AT1G12840	ossowski_1130298	insertion	intron
AT1G12840	ossowski_1178695	deletion	5'UTR
AT1G12840	ossowski_1178696	deletion	5'UTR
AT1G12840	ossowski_27614	substitution	promoter
AT1G12840	ossowski_27616	substitution	promoter
AT1G12840	ossowski_27620	substitution	promoter
AT1G12840	ossowski_27622	substitution	promoter
AT1G12840	ossowski_27624	substitution	promoter
AT1G12840	ossowski_27628	substitution	intron
AT1G12840	ossowski_27630	substitution	intron
AT1G12840	ossowski_27632	substitution	intron
AT1G12840	ossowski_27634	substitution	intron
AT1G12840	ossowski_27636	substitution	intron
AT1G12840	ossowski_27638	substitution	intron
AT1G12840	ossowski_27642	substitution	intron
AT1G12840	ossowski_27646	substitution	intron
AT1G12840	ossowski_27650	substitution	coding_region
AT1G12840	ossowski_27651	substitution	3'UTR
AT1G12840	ossowski_27653	substitution	3'UTR
AT1G12840	PERL0031010	substitution	promoter
AT1G12840	PERL0031012	substitution	exon
AT1G12840	PERL0031018	substitution	intron
AT1G12840	PERL0031021	substitution	intron
AT1G12840	PERL0031025	substitution	intron
AT1G12840	PERL0031028	substitution	exon
AT1G12840	PERL0031029	substitution	intron
AT1G12840	PERL0031031	substitution	exon
AT1G12840	SAIL_1142_G06.v1	insertion	5'UTR
AT1G12840	SAIL_1278_H08.v1	insertion	5'UTR
AT1G12840	SAIL_231_B09.v1	insertion	5'UTR
AT1G12840	SAIL_373_B10.v1	insertion	exon
AT1G12840	SAIL_517_E02.v1	insertion	promoter
AT1G12840	SAIL_870_A07.v2	insertion	promoter
AT1G12840	SALK_050220.32.25.x	insertion	promoter
AT1G12840	SALK_050228.55.00.x	insertion	promoter
AT1G12840	SALK_050235.43.85.x	insertion	promoter
AT1G12840	SALK_052825.31.45.x	insertion	promoter
AT1G12840	SALK_053357.28.50.x	insertion	5'UTR
AT1G12840	SALK_072056.54.25.x	insertion	promoter
AT1G12840	SALK_072248.17.75.x	insertion	5'UTR
AT1G12840	SALK_098934	insertion	promoter
AT1G12840	SALK_098934.47.80.x	insertion	promoter
AT1G12840	SALK_098935	insertion	promoter
AT1G12840	SALK_098935.20.30.n	insertion	promoter
AT1G12840	SALK_119884.35.00.x	insertion	promoter
AT1G12840	SALKseq_034804.1	insertion	5'UTR
AT1G12840	SALKseq_052825.0	insertion	5'UTR
AT1G12840	SALKseq_071816.1	insertion	5'UTR
AT1G12840	SALKseq_119884.0	insertion	5'UTR
AT1G12840	SK28824	insertion	5'UTR
AT1G12840	SK28840	insertion	5'UTR
AT1G12840	WiscDsLoxHs014_05C.1	insertion	5'UTR

## Sheet: VHA-D
AGI	Name	Type	Locus
AT3G58730	CSHL_GT22248	insertion	5'UTR
AT3G58730	ET14330.Ds3.05.16.2006.jy97.153	insertion	promoter
AT3G58730	ET14330.Ds5.02.17.2006.jy85.553	insertion	promoter
AT3G58730	GT22248.Ds5.08.30.2006.jz16.181	insertion	exon
AT3G58730	MASC02320	substitution	coding_region
AT3G58730	ossowski_1157382	insertion	intron
AT3G58730	ossowski_1157383	insertion	promoter
AT3G58730	ossowski_643563	substitution	5'UTR
AT3G58730	ossowski_643566	substitution	promoter
AT3G58730	ossowski_643567	substitution	promoter
AT3G58730	PERL0646436	substitution	exon
AT3G58730	PERL0646437	substitution	intron
AT3G58730	PERL0646440	substitution	intron
AT3G58730	PERL0646441	substitution	intron
AT3G58730	PERL0646442	substitution	exon
AT3G58730	PERL0646443	substitution	exon
AT3G58730	PERL0646446	substitution	promoter
AT3G58730	SALK_204178	insertion	3'UTR
AT3G58730	SALKseq_051868.3	insertion	5'UTR
AT3G58730	SALKseq_062467.1	insertion	3'UTR

## Sheet: VHA-E1-3
AGI	Name	Type	Locus
AT4G11150	AJ517060	insertion	promoter
AT4G11150	AJ517063	insertion	promoter
AT4G11150	emb2448	insertion
AT4G11150	GABI_245A04	insertion	intron
AT4G11150	GABI_546C04	insertion	3'UTR
AT4G11150	GABI_630H09	insertion	3'UTR
AT4G11150	GABI_845A04	insertion	intron
AT4G11150	GABIseq_362F02.1	insertion	3'UTR
AT4G11150	GK-546C04-020630	insertion	exon
AT4G11150	GK-546C04-021163	insertion	exon
AT4G11150	GK-630H09-022799	insertion	exon
AT4G11150	GK-845A04-025830	insertion	intron
AT4G11150	MASC01786	substitution	coding_region
AT4G11150	ossowski_1160662	insertion	promoter
AT4G11150	ossowski_1160664	insertion	intron
AT4G11150	ossowski_1160665	insertion	intron
AT4G11150	ossowski_732295	substitution	promoter
AT4G11150	ossowski_732296	substitution	promoter
AT4G11150	ossowski_732298	substitution	promoter
AT4G11150	ossowski_732299	substitution	promoter
AT4G11150	ossowski_732301	substitution	promoter
AT4G11150	ossowski_732306	substitution	intron
AT4G11150	ossowski_732308	substitution	intron
AT4G11150	ossowski_732309	substitution	intron
AT4G11150	ossowski_732310	substitution	intron
AT4G11150	ossowski_732311	substitution	intron
AT4G11150	ossowski_732312	substitution	intron
AT4G11150	ossowski_732316	substitution	intron
AT4G11150	ossowski_732317	substitution	intron
AT4G11150	ossowski_732318	substitution	intron
AT4G11150	ossowski_732319	substitution	intron
AT4G11150	ossowski_732320	substitution	intron
AT4G11150	ossowski_732321	substitution	intron
AT4G11150	ossowski_732322	substitution	intron
AT4G11150	ossowski_732324	substitution	intron
AT4G11150	ossowski_732325	substitution	intron
AT4G11150	ossowski_732326	substitution	coding_region
AT4G11150	ossowski_732329	substitution	3'UTR
AT4G11150	ossowski_732330	substitution	3'UTR
AT4G11150	ossowski_732331	substitution	3'UTR
AT4G11150	PERL0732123	substitution	promoter
AT4G11150	PERL0732124	substitution	promoter
AT4G11150	PERL0732126	substitution	promoter
AT4G11150	PERL0732128	substitution	exon
AT4G11150	PERL0732131	substitution	intron
AT4G11150	PERL0732134	substitution	exon
AT4G11150	PERL0732135	substitution	exon
AT4G11150	PERL0732140	substitution	intron
AT4G11150	PERL0732142	substitution	exon
AT4G11150	PERL0732145	substitution	intron
AT4G11150	PERL0732146	substitution	intron
AT4G11150	RATM52-0258-1_G	insertion	intron
AT4G11150	S08	insertion	intron
AT4G11150	SALK_002877.27.95.x	insertion	exon
AT4G11150	SALK_003830.56.00.x	insertion	5'UTR
AT4G11150	SALK_006180	insertion	exon
AT4G11150	SALK_006180.44.55.x	insertion	exon
AT4G11150	SALK_087937.38.15.x	insertion	intron
AT4G11150	SALK_134602.30.40.x	insertion	3'UTR
AT4G11150	SALK_134602.39.30.x	insertion	3'UTR
AT4G11150	SALK_134602.50.40.x	insertion	exon
AT4G11150	SALKseq_054798.4	insertion	coding_region
AT4G11150	SALKseq_087937.0	insertion	intron
AT4G11150	SALKseq_134602.0	insertion	3'UTR
AT4G11150	UU2573	substitution	splice_junction
AT4G11150	WiscDsLox435A3.4	insertion	intron
AT3G01390	CSHL_ET12184	insertion	coding_region
AT3G01390	CSHL_GT22377	insertion	intron
AT3G01390	CSHL_GT5215	insertion	coding_region
AT3G01390	CSHL_GT6517	insertion	coding_region
AT3G01390	CSHL_GT8687	insertion	coding_region
AT3G01390	ET12184.Ds3.08.01.2005.jy56.203	insertion	intron
AT3G01390	GT_5_109861	insertion	coding_region
AT3G01390	GT_5_109863	insertion	coding_region
AT3G01390	GT_5_109864	insertion	coding_region
AT3G01390	GT_5_109909	insertion	coding_region
AT3G01390	GT22377.Ds5.09.21.2006.jz17.276	insertion	intron
AT3G01390	GT5215.Ds3.11.29.00.JU69.b.108	insertion	exon
AT3G01390	GT5215.Ds5.12.18.2002.jw75.211	insertion	exon
AT3G01390	GT6517.Ds3.01.31.00.b.176	insertion	exon
AT3G01390	GT8687.Ds3.03.20.2002.jw22.120	insertion	exon
AT3G01390	ossowski_457382	substitution	intron
AT3G01390	ossowski_457383	substitution	intron
AT3G01390	ossowski_457384	substitution	intron
AT3G01390	PERL0434747	substitution	promoter
AT3G01390	PERL0434748	substitution	promoter
AT3G01390	PERL0434749	substitution	promoter
AT3G01390	PERL0434751	substitution	promoter
AT3G01390	PERL0434755	substitution	exon
AT3G01390	PERL0434765	substitution	exon
AT3G01390	SALK_028647.56.00.x	insertion	intron
AT3G01390	SALK_030407.45.55.x	insertion	exon
AT3G01390	SALK_038082	insertion	intron
AT3G01390	SALK_038082.54.25.x	insertion	intron
AT3G01390	SALK_038083.25.20.x	insertion	exon
AT3G01390	SALK_038083.29.99.f	insertion	intron
AT3G01390	SALKseq_132594.4	insertion	intron
AT3G01390	SGCSNP3848	substitution	promoter
AT3G01390	SK40709	insertion	coding_region
AT1G64200	PERL0212040	substitution	exon
AT1G64200	PERL0212046	substitution	exon
AT1G64200	PERL0212051	substitution	exon
AT1G64200	PERL0212058	substitution	intron
AT1G64200	PERL0212060	substitution	intron
AT1G64200	PERL0212061	substitution	exon
AT1G64200	PERL0212070	substitution	promoter
AT1G64200	SAIL_138_C07.v2	insertion	coding_region
AT1G64200	SAIL_71_G12.v1	insertion	3'UTR
AT1G64200	SALK_070562.54.50.x	insertion	3'UTR
AT1G64200	SALK_070563.56.00.x	insertion	3'UTR
AT1G64200	SALK_131305.15.60.x	insertion	intron
AT1G64200	SALKseq_070563.0	insertion	3'UTR
AT1G64200	SALKseq_081993.2	insertion	intron
AT1G64200	SALKseq_134602.1	insertion	5'UTR
AT1G64200	SALKseq_24723.2	insertion	5'UTR
AT1G64200	WiscDsLoxHs082_05B.1	insertion	5'UTR

## Sheet: VHA-F
AGI	Name	Type	Locus
AT4G02620	ossowski_1158590	insertion	intron
AT4G02620	ossowski_1158591	insertion	promoter
AT4G02620	ossowski_667383	substitution	intron
AT4G02620	ossowski_667385	substitution	promoter
AT4G02620	ossowski_667386	substitution	promoter
AT4G02620	ossowski_667387	substitution	promoter
AT4G02620	ossowski_667388	substitution	promoter
AT4G02620	ossowski_667389	substitution	promoter
AT4G02620	PERL0669403	substitution	exon
AT4G02620	PERL0669406	substitution	intron
AT4G02620	PERL0669408	substitution	intron
AT4G02620	SALK_019741.56.00.x	insertion	exon
AT4G02620	SK16202	insertion	5'UTR

## Sheet: VHA-G1-3
AGI	Name	Type	Locus
AT3G01390	GABI_359F02	insertion	5'UTR
AT3G01390	GABI_458D10	insertion	5'UTR
AT3G01390	GABI_763C12	insertion	coding_region
AT3G01390	GABI_957C02	insertion	5'UTR
AT3G01390	GABI_957H03	insertion	5'UTR
AT3G01390	GK-150C11-013398	insertion	promoter
AT3G01390	GK-359F02-016877	insertion	exon
AT3G01390	GK-359F02-016879	insertion	exon
AT3G01390	GK-458D10-018853	insertion	exon
AT3G01390	GK-458D10-018859	insertion	exon
AT3G01390	GK-763C12-023869	insertion	exon
AT3G01390	GK-768G01-023590	insertion	promoter
AT3G01390	GK-957C02-033599	insertion	exon
AT3G01390	GK-957C02-033600	insertion	exon
AT3G01390	GK-957H03-033599	insertion	intron
AT3G01390	GT25089.Ds3.03.04.2009.jz55.285	insertion	promoter
AT3G01390	ossowski_1148933	insertion	intron
AT3G01390	ossowski_443466	substitution	promoter
AT3G01390	PERL0417015	substitution	exon
AT3G01390	PERL0417016	substitution	promoter
AT3G01390	SAIL_19_H10	insertion	3'UTR
AT3G01390	SAIL_289_E01	insertion	5'UTR
AT3G01390	SALKseq_087613.0	insertion	5'UTR
AT3G01390	SALKseq_130619.0	insertion	3'UTR
AT3G01390	TJtaqman28	substitution	3'UTR
AT3G01390	WiscDsLox421C10.2	insertion	5'UTR
AT3G01390	WiscDsLoxHs006_09A	insertion	coding_region
AT3G01390	WiscDsLoxHs006_09A.0	insertion	coding_region
AT4G23710	GABI_241D02	insertion	5'UTR
AT4G23710	GABI_241E01	insertion	5'UTR
AT4G23710	GK-241D02-014367	insertion	promoter
AT4G23710	GK-241D02-014371	insertion	promoter
AT4G23710	ossowski_1163930	insertion	promoter
AT4G23710	ossowski_1163931	insertion	exon
AT4G23710	ossowski_1163932	insertion	intron
AT4G23710	ossowski_1163933	insertion	intron
AT4G23710	ossowski_1163934	insertion	intron
AT4G23710	ossowski_798711	substitution	promoter
AT4G23710	ossowski_798712	substitution	promoter
AT4G23710	ossowski_798713	substitution	promoter
AT4G23710	ossowski_798714	substitution	promoter
AT4G23710	ossowski_798715	substitution	promoter
AT4G23710	ossowski_798716	substitution	promoter
AT4G23710	ossowski_798717	substitution	promoter
AT4G23710	ossowski_798718	substitution	promoter
AT4G23710	ossowski_798719	substitution	promoter
AT4G23710	ossowski_798720	substitution	promoter
AT4G23710	ossowski_798721	substitution	promoter
AT4G23710	ossowski_798722	substitution	promoter
AT4G23710	ossowski_798723	substitution	promoter
AT4G23710	ossowski_798724	substitution	intron
AT4G23710	ossowski_798725	substitution	intron
AT4G23710	ossowski_798726	substitution	intron
AT4G23710	ossowski_798727	substitution	intron
AT4G23710	ossowski_798728	substitution	intron
AT4G23710	ossowski_798729	substitution	intron
AT4G23710	ossowski_798730	substitution	intron
AT4G23710	ossowski_798731	substitution	intron
AT4G23710	ossowski_798732	substitution	intron
AT4G23710	ossowski_798733	substitution	intron
AT4G23710	ossowski_798734	substitution	5'UTR
AT4G23710	ossowski_798735	substitution	coding_region
AT4G23710	ossowski_798737	substitution	intron
AT4G23710	ossowski_798738	substitution	intron
AT4G23710	ossowski_798739	substitution	intron
AT4G23710	ossowski_798740	substitution	intron
AT4G23710	ossowski_798741	substitution	intron
AT4G23710	ossowski_798742	substitution	intron
AT4G23710	ossowski_798743	substitution	intron
AT4G23710	ossowski_798744	substitution	intron
AT4G23710	ossowski_798745	substitution	intron
AT4G23710	ossowski_798746	substitution	intron
AT4G23710	ossowski_798747	substitution	intron
AT4G23710	ossowski_798749	substitution	intron
AT4G23710	ossowski_798750	substitution	intron
AT4G23710	ossowski_798752	substitution	coding_region
AT4G23710	ossowski_798755	substitution	3'UTR
AT4G23710	ossowski_798756	substitution	3'UTR
AT4G23710	ossowski_798757	substitution	3'UTR
AT4G23710	ossowski_798758	substitution	3'UTR
AT4G23710	ossowski_798759	substitution	3'UTR
AT4G23710	ossowski_798762	substitution	3'UTR
AT4G23710	PERL0809864	substitution	promoter
AT4G23710	PERL0809867	substitution	promoter
AT4G23710	PERL0809883	substitution	exon
AT4G23710	PERL0809886	substitution	intron
AT4G23710	PERL0809891	substitution	intron
AT4G23710	PERL0809892	substitution	intron
AT4G23710	PERL0809893	substitution	exon
AT4G23710	PERL0809894	substitution	exon
AT4G23710	PERL0809900	substitution	exon
AT4G23710	PERL0809901	substitution	exon
AT4G23710	SAIL_398_B10.v1	insertion	promoter
AT4G23710	SALK_022679.18.30.x	insertion	promoter
AT4G23710	SALKseq_063702.14	insertion	intron
AT4G23710	SGCSNP12951	substitution	promoter
AT4G23710	WiscDsLoxHs132_02F	insertion	coding_region
AT4G25950	CSHL_ET12774	insertion	3'UTR
AT4G25950	ET12774.Ds3.05.23.2004.jx65.632	insertion	exon
AT4G25950	ET12774.Ds5.05.23.2004.jx63.424	insertion	exon
AT4G25950	GABI_253F07	insertion	coding_region
AT4G25950	GABI_787D05	insertion	3'UTR
AT4G25950	GK-198A09-025984	insertion	promoter
AT4G25950	GK-253F07-014574	insertion	intron
AT4G25950	GK-253F07-014578	insertion	exon
AT4G25950	ossowski_802684	substitution	5'UTR
AT4G25950	ossowski_802686	substitution	coding_region
AT4G25950	PERL0816694	substitution	exon
AT4G25950	PERL0816697	substitution	exon
AT4G25950	PERL0816700	substitution	exon
AT4G25950	PERL0816702	substitution	promoter
AT4G25950	PERL0816703	substitution	promoter

## Sheet: VHA-H
AGI	Name	Type	Locus
AT3G42050	FLAG_237C09	insertion	5'UTR
AT3G42050	FLAG_538D02	insertion	intron
AT3G42050	GABI_428F10	insertion	5'UTR
AT3G42050	GK-210E11-014135	insertion	promoter
AT3G42050	GK-428F10-018077	insertion	promoter
AT3G42050	MASC07409	substitution	5'UTR
AT3G42050	ossowski_1202856	deletion	promoter
AT3G42050	ossowski_560094	substitution	intron
AT3G42050	ossowski_560099	substitution	intron
AT3G42050	ossowski_560101	substitution	intron
AT3G42050	ossowski_560103	substitution	intron
AT3G42050	ossowski_560105	substitution	coding_region
AT3G42050	ossowski_560106	substitution	intron
AT3G42050	ossowski_560107	substitution	intron
AT3G42050	ossowski_560109	substitution	intron
AT3G42050	ossowski_560111	substitution	intron
AT3G42050	ossowski_560112	substitution	intron
AT3G42050	ossowski_560114	substitution	intron
AT3G42050	ossowski_560115	substitution	intron
AT3G42050	ossowski_560116	substitution	intron
AT3G42050	ossowski_560117	substitution	intron
AT3G42050	ossowski_560120	substitution	promoter
AT3G42050	ossowski_560121	substitution	promoter
AT3G42050	ossowski_560123	substitution	promoter
AT3G42050	ossowski_560125	substitution	promoter
AT3G42050	ossowski_560126	substitution	promoter
AT3G42050	ossowski_560128	substitution	promoter
AT3G42050	ossowski_560129	substitution	promoter
AT3G42050	ossowski_560130	substitution	promoter
AT3G42050	ossowski_560132	substitution	promoter
AT3G42050	ossowski_560133	substitution	promoter
AT3G42050	ossowski_560134	substitution	promoter
AT3G42050	ossowski_560136	substitution	promoter
AT3G42050	PERL0558016	substitution	exon
AT3G42050	PERL0558019	substitution	exon
AT3G42050	PERL0558026	substitution	intron
AT3G42050	PERL0558027	substitution	intron
AT3G42050	PERL0558040	substitution	exon
AT3G42050	PERL0558049	substitution	exon
AT3G42050	PERL0558050	substitution	intron
AT3G42050	PERL0558054	substitution	promoter
AT3G42050	PERL0558058	substitution	promoter
AT3G42050	SALK_080525.32.50.n	insertion	promoter
AT3G42050	SALK_117151.27.95.x	insertion	exon
AT3G42050	SALK_139745.50.10.x	insertion	intron
AT3G42050	SALKseq_051545.1	insertion	5'UTR
AT3G42050	SALKseq_080525.0	insertion	5'UTR
AT3G42050	SALKseq_083370.1	insertion	coding_region
AT3G42050	SALKseq_117151.0	insertion	3'UTR
AT3G42050	SALKseq_131666.3	insertion	5'UTR
AT3G42050	SALKseq_139745.0	insertion	intron
AT3G42050	WiscDsLoxHs093_11H	insertion	5'UTR

## Sheet: VHA-a1-3
AGI	Name	Type	Locus
AT2G28520	FLAG_199C12	insertion	promoter
AT2G28520	GABI_496E09	insertion	3'UTR
AT2G28520	GABIseq_509H08.1	insertion	intron
AT2G28520	GK-496E09-019628	insertion	exon
AT2G28520	ossowski_399271	substitution	promoter
AT2G28520	ossowski_399272	substitution	promoter
AT2G28520	ossowski_399273	substitution	promoter
AT2G28520	ossowski_399274	substitution	promoter
AT2G28520	ossowski_399275	substitution	promoter
AT2G28520	ossowski_399276	substitution	intron
AT2G28520	ossowski_399277	substitution	intron
AT2G28520	ossowski_399278	substitution	intron
AT2G28520	ossowski_399279	substitution	intron
AT2G28520	PERL0372047	substitution	exon
AT2G28520	PERL0372048	substitution	intron
AT2G28520	PERL0372049	substitution	intron
AT2G28520	PERL0372056	substitution	intron
AT2G28520	PERL0372060	substitution	intron
AT2G28520	PERL0372062	substitution	intron
AT2G28520	PERL0372067	substitution	exon
AT2G28520	PERL0372068	substitution	exon
AT2G28520	PERL0372069	substitution	exon
AT2G28520	SAIL_420_D02.v1	insertion	intron
AT2G28520	SALK_034646	insertion	exon
AT2G28520	SALK_034646.54.25.x	insertion	exon
AT2G28520	SALK_034647.29.99.f	insertion	5'UTR
AT2G28520	SALK_034647.35.60.x	insertion	exon
AT2G28520	SALK_109502.54.45.x	insertion	intron
AT2G28520	SALK_109511.49.00.x	insertion	exon
AT2G28520	SALK_146103.14.25.x	insertion	intron
AT2G28520	SALK_205198	insertion	5'UTR
AT2G28520	SALKseq_033375.1	insertion	3'UTR
AT2G28520	SALKseq_035990.1	insertion	5'UTR
AT2G28520	SALKseq_058727.1	insertion	intron
AT2G28520	SALKseq_084125.1	insertion	3'UTR
AT2G28520	SALKseq_109502.0	insertion	intron
AT2G28520	SALKseq_135047.1	insertion	coding_region
AT2G28520	WiscDsLox376A11	insertion	exon
AT2G28520	WiscDsLox376A11.0	insertion	3'UTR
AT2G21410	GABI_338C04	insertion	5'UTR
AT2G21410	GABI_611F12	insertion	5'UTR
AT2G21410	GK-338C04-016159	insertion	promoter
AT2G21410	GK-611F12-021892	insertion	exon
AT2G21410	ossowski_1144977	insertion	intron
AT2G21410	ossowski_1193802	deletion	intron
AT2G21410	ossowski_372281	substitution	promoter
AT2G21410	ossowski_372282	substitution	promoter
AT2G21410	ossowski_372283	substitution	promoter
AT2G21410	ossowski_372286	substitution	intron
AT2G21410	ossowski_372288	substitution	coding_region
AT2G21410	ossowski_372289	substitution	intron
AT2G21410	ossowski_372290	substitution	coding_region
AT2G21410	ossowski_372291	substitution	coding_region
AT2G21410	ossowski_372292	substitution	intron
AT2G21410	ossowski_372294	substitution	intron
AT2G21410	ossowski_372297	substitution	intron
AT2G21410	ossowski_372301	substitution	3'UTR
AT2G21410	ossowski_372302	substitution	3'UTR
AT2G21410	ossowski_372303	substitution	3'UTR
AT2G21410	ossowski_372304	substitution	3'UTR
AT2G21410	PERL0351768	substitution	exon
AT2G21410	PERL0351769	substitution	exon
AT2G21410	PERL0351773	substitution	intron
AT2G21410	PERL0351775	substitution	intron
AT2G21410	PERL0351777	substitution	exon
AT2G21410	PERL0351783	substitution	intron
AT2G21410	PERL0351784	substitution	exon
AT2G21410	SAIL_1159_E08.v1	insertion	coding_region
AT2G21410	SAIL_1187_G07.v1	insertion	promoter
AT2G21410	SAIL_740_F01.v2	insertion	5'UTR
AT2G21410	SALK_007514	insertion	promoter
AT2G21410	SALK_099285.42.50.x	insertion	exon
AT2G21410	SALK_105498.24.45.x	insertion	intron
AT2G21410	SALK_142642.38.40.x	insertion	exon
AT2G21410	SALK_142642.50.25.x	insertion	exon
AT2G21410	SALKseq_054365.0	insertion	5'UTR
AT2G21410	SALKseq_068136.3	insertion	3'UTR
AT2G21410	SALKseq_129756.1	insertion	5'UTR
AT2G21410	SALKseq_136526.1	insertion	coding_region
AT2G21410	WiscDsLox477-480A12.1	insertion	intron
AT4G39080	GABI_331B09	insertion	3'UTR
AT4G39080	GK-331B09-016037	insertion	exon
AT4G39080	GK-457F10-018858	insertion	promoter
AT4G39080	GK-774E02-025602	insertion	promoter
AT4G39080	GK-774E02-025641	insertion	promoter
AT4G39080	GK-889A03-030257	insertion	promoter
AT4G39080	ossowski_1165922	insertion	intron
AT4G39080	ossowski_1215151	deletion	promoter
AT4G39080	ossowski_834245	substitution	promoter
AT4G39080	ossowski_834246	substitution	intron
AT4G39080	ossowski_834247	substitution	intron
AT4G39080	ossowski_834248	substitution	intron
AT4G39080	ossowski_834249	substitution	coding_region
AT4G39080	ossowski_834250	substitution	intron
AT4G39080	ossowski_834251	substitution	coding_region
AT4G39080	ossowski_834252	substitution	intron
AT4G39080	PERL0850769	substitution	intron
AT4G39080	PERL0850773	substitution	coding_region
AT4G39080	PERL0850775	substitution	exon
AT4G39080	PERL0850787	substitution	exon
AT4G39080	PERL0850790	substitution	intron
AT4G39080	RATM11-5875-1_G	insertion	3'UTR
AT4G39080	RATM12-0578-1_G	insertion	5'UTR
AT4G39080	RATM12-0578-1_H	insertion	5'UTR
AT4G39080	SAIL_450_C01.v1	insertion	intron
AT4G39080	SAILseq_708_B08.1	insertion	intron
AT4G39080	SALK_005520.44.35.x	insertion	exon
AT4G39080	SALK_005523.48.30.x	insertion	exon
AT4G39080	SALK_029786.39.90.x	insertion	exon
AT4G39080	SALK_119654.52.05.x	insertion	exon
AT4G39080	SALKseq_036806.3	insertion	3'UTR
AT4G39080	SALKseq_043227.1	insertion	3'UTR
AT4G39080	SALKseq_045379.101	insertion	3'UTR
AT4G39080	SALKseq_049502.3	insertion	intron
AT4G39080	SK18785	insertion	coding_region
AT4G39080	WiscDsLox320H05.2	insertion	3'UTR

## Sheet: VHA-c1-5
AGI	Name	Type	Locus
AT4G34720	GABI_090H02	insertion	intron
AT4G34720	GABI_571E07	insertion	5'UTR
AT4G34720	GABI_692C01	insertion	5'UTR
AT4G34720	GABI_693C01	insertion	5'UTR
AT4G34720	GABI_694C01	insertion	intron
AT4G34720	GABI_738C02	insertion	intron
AT4G34720	GK-571E07-021196	insertion	promoter
AT4G34720	GK-571E07-023142	insertion	promoter
AT4G34720	GK-571E07-023195	insertion	promoter
AT4G34720	GK-572F07-021191	insertion	promoter
AT4G34720	GK-626E05-022317	insertion	promoter
AT4G34720	GK-692C01-025067	insertion	exon
AT4G34720	GK-692C01-025071	insertion	intron
AT4G34720	GK-694C01-024557	insertion	exon
AT4G34720	GK-738C02-023900	insertion	intron
AT4G34720	GT_5_96759	insertion	coding_region
AT4G34720	GT_5_96857	insertion	coding_region
AT4G34720	PERL0839605	substitution	intron
AT4G34720	SALKseq_055287.1	insertion	3'UTR
AT4G34720	SALKseq_069286.0	insertion	5'UTR
AT4G34720	SALKseq_077896.4	insertion	3'UTR
AT4G34720	SALKseq_092257.1	insertion	5'UTR
AT1G19910	AMU-1-077	deletion	unknown
AT1G19910	GABI_693H01	insertion	3'UTR
AT1G19910	GABI_779D11	insertion	3'UTR
AT1G19910	GABIseq_534C11.1	insertion	coding_region
AT1G19910	GK-693H01-025068	insertion	exon
AT1G19910	GK-779D11-024662	insertion	exon
AT1G19910	GK-779D11-024867	insertion	exon
AT1G19910	GK-865G08-026110	insertion	promoter
AT1G19910	MASC08363	substitution	coding_region
AT1G19910	ossowski_41224	substitution	promoter
AT1G19910	ossowski_41226	substitution	5'UTR
AT1G19910	ossowski_41228	substitution	intron
AT1G19910	PERL0050234	substitution	exon
AT1G19910	SAILseq_570_H01.1	insertion	3'UTR
AT1G19910	SALKseq_051571.4	insertion	intron
AT4G38920	CSHL_GT9294	insertion	5'UTR
AT4G38920	ET5614.Ds3.02.28.00.b.431	insertion	promoter
AT4G38920	GABI_079C06	insertion	3'UTR
AT4G38920	GABI_159H08	insertion	coding_region
AT4G38920	GABI_232E08	insertion	3'UTR
AT4G38920	GABI_232E09	insertion	coding_region
AT4G38920	GABI_453F12	insertion	5'UTR
AT4G38920	GABI_857E12	insertion	3'UTR
AT4G38920	GABI_899C01	insertion	intron
AT4G38920	GK-020G05-013478	insertion	promoter
AT4G38920	GK-020G05-013492	insertion	promoter
AT4G38920	GK-079C06-011888	insertion	exon
AT4G38920	GK-079C06-011917	insertion	exon
AT4G38920	GK-159H08-012549	insertion	exon
AT4G38920	GK-232E08-014318	insertion	exon
AT4G38920	GK-232E09-014318	insertion	exon
AT4G38920	GK-453F12-018812	insertion	exon
AT4G38920	GK-453F12-018814	insertion	exon
AT4G38920	GK-857E12-025966	insertion	exon
AT4G38920	GK-899C01-030263	insertion	intron
AT4G38920	GK-899C01-030281	insertion	exon
AT4G38920	GT9294.Ds3.09.27.00.b.76	insertion	exon
AT4G38920	MASC03591	substitution	intron
AT4G38920	MASC03592	substitution	intron
AT1G75630	ET8128.Ds3.09.27.00.b.192	insertion	promoter
AT1G75630	ossowski_257531	substitution	promoter
AT1G75630	FLAG_062G11	insertion	exon
AT1G75630	GABI_015D11	insertion	5'UTR
AT1G75630	GABIseq_362E09.1	insertion	intron
AT1G75630	GK-015D11-019122	insertion	exon
AT1G75630	GK-015D11-019208	insertion	exon
AT1G75630	GK-320C05-015944	insertion	promoter
AT1G75630	GK-320C05-015948	insertion	promoter
AT1G75630	ossowski_1140767	insertion	promoter
AT1G75630	ossowski_1140768	insertion	3'UTR
AT1G75630	ossowski_1189527	deletion	promoter
AT1G75630	ossowski_1189528	deletion	promoter
AT1G75630	ossowski_1189529	deletion	promoter
AT1G75630	ossowski_1189530	deletion	promoter
AT1G75630	ossowski_257520	substitution	promoter
AT1G75630	ossowski_257521	substitution	promoter
AT1G75630	ossowski_257522	substitution	promoter
AT1G75630	ossowski_257523	substitution	promoter
AT1G75630	ossowski_257524	substitution	promoter
AT1G75630	ossowski_257525	substitution	promoter
AT1G75630	ossowski_257526	substitution	promoter
AT1G75630	ossowski_257527	substitution	promoter
AT1G75630	ossowski_257528	substitution	promoter
AT1G75630	ossowski_257529	substitution	promoter
AT1G75630	ossowski_257531	substitution	promoter
AT1G75630	ossowski_257532	substitution	promoter
AT1G75630	ossowski_257534	substitution	5'UTR
AT1G75630	ossowski_257535	substitution	5'UTR
AT1G75630	ossowski_257536	substitution	coding_region
AT1G75630	ossowski_257538	substitution	intron
AT1G75630	ossowski_257539	substitution	intron
AT1G75630	ossowski_257540	substitution	coding_region
AT1G75630	ossowski_257541	substitution	intron
AT1G75630	ossowski_257544	substitution	3'UTR
AT1G75630	PERL0255782	substitution	promoter
AT1G75630	PERL0255788	substitution	5'UTR
AT1G75630	PERL0255789	substitution	coding_region
AT1G75630	PERL0255795	substitution	3'UTR
AT1G75630	SAIL_221_G08.v1	insertion	promoter
AT1G75630	SAIL_635_C09.v1	insertion	5'UTR
AT1G75630	SAIL_859_F02.v1	insertion	exon
AT1G75630	SAILseq_859_F02.0	insertion	3'UTR
AT1G75630	SALK_002858	insertion	exon
AT1G75630	SALK_002858.48.80.x	insertion	exon
AT1G75630	SALK_032132	insertion	promoter
AT1G75630	SALKseq_077053.1	insertion	3'UTR
AT1G75630	SALKseq_139128.1	insertion	5'UTR
AT1G75630	WiscDsLox461-464O11	insertion	exon
AT1G75630	WiscDsLox461-464O11.0	insertion	3'UTR
AT2G16510	fc1-2	insertion	promoter
AT2G16510	ossowski_351277	substitution	5'UTR
AT2G16510	GABI_052B04	insertion	3'UTR
AT2G16510	GABI_110C02	insertion	5'UTR
AT2G16510	GABI_110D02	insertion	coding_region
AT2G16510	GK-110C02-012311	insertion	promoter
AT2G16510	GK-110C02-012332	insertion	exon
AT2G16510	GK-656H12-022841	insertion	promoter
AT2G16510	MASC00482	substitution	coding_region
AT2G16510	MASC00483	substitution	coding_region
AT2G16510	MASC00484	substitution	coding_region
AT2G16510	MASC00485	substitution	coding_region
AT2G16510	MASC00486	substitution	coding_region
AT2G16510	MASC00487	substitution	coding_region
AT2G16510	ossowski_1144015	insertion	5'UTR
AT2G16510	ossowski_1144016	insertion	5'UTR
AT2G16510	ossowski_1144018	insertion	intron
AT2G16510	ossowski_1144019	insertion	3'UTR
AT2G16510	ossowski_1192769	deletion	5'UTR
AT2G16510	ossowski_1192771	deletion	5'UTR
AT2G16510	ossowski_1192772	deletion	intron
AT2G16510	ossowski_351270	substitution	5'UTR
AT2G16510	ossowski_351271	substitution	5'UTR
AT2G16510	ossowski_351273	substitution	5'UTR
AT2G16510	ossowski_351275	substitution	5'UTR
AT2G16510	ossowski_351277	substitution	5'UTR
AT2G16510	ossowski_351279	substitution	5'UTR
AT2G16510	ossowski_351281	substitution	5'UTR
AT2G16510	ossowski_351285	substitution	5'UTR
AT2G16510	ossowski_351287	substitution	5'UTR
AT2G16510	ossowski_351289	substitution	5'UTR
AT2G16510	ossowski_351290	substitution	coding_region
AT2G16510	ossowski_351292	substitution	coding_region
AT2G16510	ossowski_351296	substitution	intron
AT2G16510	ossowski_351298	substitution	intron
AT2G16510	ossowski_351308	substitution	intron
AT2G16510	ossowski_351309	substitution	intron
AT2G16510	ossowski_351311	substitution	intron
AT2G16510	ossowski_351313	substitution	intron
AT2G16510	ossowski_351315	substitution	intron
AT2G16510	ossowski_351317	substitution	intron
AT2G16510	ossowski_351319	substitution	intron
AT2G16510	ossowski_351323	substitution	3'UTR
AT2G16510	ossowski_351324	substitution	3'UTR
AT2G16510	ossowski_351326	substitution	promoter
AT2G16510	ossowski_351329	substitution	promoter
AT2G16510	ossowski_351331	substitution	promoter
AT2G16510	ossowski_351333	substitution	promoter
AT2G16510	ossowski_351335	substitution	promoter
AT2G16510	ossowski_351337	substitution	promoter
AT2G16510	ossowski_351339	substitution	promoter
AT2G16510	ossowski_351341	substitution	promoter
AT2G16510	ossowski_351343	substitution	promoter
AT2G16510	ossowski_351344	substitution	promoter
AT2G16510	ossowski_351345	substitution	promoter
AT2G16510	ossowski_351346	substitution	promoter
AT2G16510	PERL0336345	substitution	exon
AT2G16510	PERL0336349	substitution	exon
AT2G16510	PERL0336355	substitution	promoter
AT2G16510	SAIL_654_E11.v1	insertion	exon
AT2G16510	SAIL_654_E11.v2	insertion	exon
AT2G16510	SALKseq_049424.1	insertion	5'UTR
AT2G16510	SALKseq_106894.2	insertion	5'UTR

[truncated: 4 more sheets: VHA-c"1-2, VHA-d1-2, VHA-e1-2, Vma21a-b]
